# Supplementary material for: Time-varying and tissue-dependent effects of adiposity on leptin levels: A Mendelian randomization study
Source: eLife. 2023 Oct 25;12:e84646. doi: 10.7554/eLife.84646 (PMC10599655; doi:10.7554/eLife.84646)
Supplement: Supplementary file 1. — (a) Exposures and outcomes in this study. (b) Multivariable Mendelian randomization using lifecourse instruments on childhood leptin. (c) Univariable Mendelian randomization using lifecourse instruments. (d) Multivariable Mendelian randomization using lifecourse instruments on adult leptin. (e) Univariable and multivariable lifecourse Mendelian randomization analyses using adulthood leptin data derived from deCODE. (f) Multivariable Mendelian randomization analysis of DXA-derived measures in ALSPAC. (g) Multivariable Mendelian randomization analysis of skinfold measures in ALSPAC. (h) Multivariable Mendelian randomization using tissue-partitioned instruments on childhood leptin. (i) Univariable Mendelian randomization using tissue-partitioned instruments. (j) Multivariable Mendelian randomization using tissue-partitioned instruments on adult leptin. (k) Univariable and multivariable tissue-partitioned Mendelian randomization analyses using adulthood leptin data derived from deCODE. (l) Cochran’s Q-statistics and MR-Egger intercept terms. (m) Multivariable Mendelian randomization using tissue-partitioned instruments on adult measures of fat distribution. [file elife-84646-supp1.xlsx]

## Sheet: 1a Exposures and outcomes
Supplementary File 1a: Exposures and outcomes in this study
Exposures
Exposure	nSNPs	Two-sample conditional F-stats	Study	URL
Childhood body size	313	13.6	Richardson et al (2020)	https://www.bmj.com/content/369/bmj.m1203
Adult body size	580	16	Richardson et al (2020)	https://www.bmj.com/content/369/bmj.m1203
Adipose BMI	86	26.3	Leyden et al (2022)	https://www.cell.com/ajhg/fulltext/S0002-9297(21)00468-7
Brain BMI	140	35.9	Leyden et al (2022)	https://www.cell.com/ajhg/fulltext/S0002-9297(21)00468-7
Outcomes
Outcome	Mean age	URL
Leptin (ALSPAC)	9.9 years	http://www.bristol.ac.uk/alspac/researchers/access/
DXA measures	9.9 years	http://www.bristol.ac.uk/alspac/researchers/access/
Skinfold measurees	5.2 years	http://www.bristol.ac.uk/alspac/researchers/access/
Leptin (Fenland)	48.5 yeears	https://www.mrc-epid.cam.ac.uk/research/studies/fenland/information-for-researchers/
Leptin (deCODE)	55 years	https://www.decode.com/summarydata/

## Sheet: 1b Lifecourse ALSPAC
Supplementary File 1b: Multivariable Mendelian randomization using lifecourse instruments on childhood leptin
		Univariable MR			Multivariable MR
Exposure	Outcome	Beta	SE	P	Beta_MV	SE_MV	P_MV
Childhood body size	Leptin	1.28036	0.0939241	1.99412e-41	1.09985	0.0996083	5.86501e-28
Adult body size	Leptin	0.782986	0.0822451	2.84633e-21	0.457679	0.0862598	1.18022e-07

## Sheet: 1c Lifecourse UVMR
Supplementary File 1c: Univariable Mendelian randomization using lifecourse instruments
Exposure	Outcome	nSNPs	MR Method	Beta	SE	P
Childhood adiposity	Leptin	301	Inverse variance weighted	0.480727	0.063813	4.94439e-14
Childhood adiposity	Leptin	301	Weighted median	0.632137	0.097977	1.10462e-10
Childhood adiposity	Leptin	301	MR-Egger	0.714206	0.141647	7.99202e-07
Adult adiposity	Leptin	551	Inverse variance weighted	0.58959	0.0497708	2.25467e-32
Adult adiposity	Leptin	551	Weighted median	0.62431	0.0774987	7.89923e-16
Adult adiposity	Leptin	551	MR-Egger	0.814013	0.141694	1.52561e-08

## Sheet: 1d Lifecourse MVMR
Supplementary File 1d: Multivariable Mendelian randomization using lifecourse instruments on adult leptin
			Univariable MR			Multivariable MR
Exposure	Outcome	nSNPs	Beta	SE	P	Beta_MV	SE_MV	P_MV
Childhood adiposity	Leptin	301	0.480727	0.063813	4.94439e-14	0.0679317	0.080305	0.397597
Adult adiposity	Leptin	551	0.58959	0.0497708	2.25467e-32	0.557511	0.0695557	1.09851e-15

## Sheet: 1e Lifecourse deCODE
Supplementary File 1e: Univariable and Multivariable Lifecourse Mendelian randomization analyses using adulthood leptin data derived from deCODE
Univariable Lifecourse MR
Exposure	Outcome	nSNPs	MR Method	Beta	SE	P
Childhood adiposity	Leptin	281	Inverse variance weighted	0.696	0.0582549	6.34444e-33
Childhood adiposity	Leptin	281	Weighted median	0.7	0.0802925	2.84554e-18
Childhood adiposity	Leptin	281	MR-Egger	0.987621	0.12795	2.10467e-13
Adult adiposity	Leptin	511	Inverse variance weighted	0.87	0.0425592	5.904e-93
Adult adiposity	Leptin	511	Weighted median	0.882497	0.06287	9.27399e-45
Adult adiposity	Leptin	511	MR-Egger	1.16098	0.122134	7.81126e-20
Multivariable Lifecourse MR
			Univariable MR			Multivariable MR
Exposure	Outcome	nSNPs	Beta	SE	P	Beta_MV	SE_MV	P_MV
Childhood adiposity	Leptin	281	0.696	0.0582549	6.34444e-33	0.221901	0.070116	0.002
Adult adiposity	Leptin	511	0.87	0.0425592	5.904e-93	0.7374	0.0610237	1.28593e-33

## Sheet: 1f Lifecourse DXA
Supplementary File 1f: Multivariable Mendelian randomization analysis of DXA-derived measures in ALSPAC
Adult-BMI & Child-BMI GRS									Brain-BMI & Adipose-BMI GRS
outcome	exposure	beta	se	p	lower_CI	upper_CI			outcome	exposure	beta	se	p	lower_CI	upper_CI
trunk_bone	adult_score	0.283255	0.0884597	0.00137	0.109873	0.456635			trunk_bone	brain_score	0.294778	0.133358	0.0271	0.033396	0.55616
	child_score	0.707877	0.101118	2.85e-12	0.509685	0.906069				adipose_score	0.172471	0.164209	0.294	-0.149378	0.49432
trunk_fat	adult_score	0.602437	0.0850687	1.6e-12	0.435702	0.769172			trunk_fat	brain_score	0.493793	0.131291	0.000171	0.236463	0.751122
	child_score	1.41797	0.0972421	2.69e-47	1.22738	1.60856				adipose_score	0.26339	0.161663	0.103	-0.0534696	0.580249
trunk_lean	adult_score	0.183546	0.0881286	0.0373	0.0108145	0.356278			trunk_lean	brain_score	0.338196	0.132399	0.0107	0.0786948	0.597697
	child_score	0.527964	0.10074	1.66e-07	0.330514	0.725414				adipose_score	0.0682444	0.163027	0.676	-0.251289	0.387778
total_bone	adult_score	0.531374	0.0958872	3.16e-08	0.343435	0.719313			total_bone	brain_score	0.317619	0.145538	0.0291	0.0323654	0.602874
	child_score	0.769018	0.110065	3.19e-12	0.553291	0.984746				adipose_score	0.191437	0.178849	0.284	-0.159106	0.541981
total_fat	adult_score	0.709447	0.0922589	1.78e-14	0.52862	0.890275			total_fat	brain_score	0.636765	0.142686	8.28e-06	0.357101	0.916428
	child_score	1.38525	0.1059	1.9e-38	1.17769	1.59282				adipose_score	0.29649	0.175344	0.0909	-0.0471831	0.640164
total_lean	adult_score	0.444267	0.0961402	3.92e-06	0.255833	0.632702			total_lean	brain_score	0.344795	0.145153	0.0176	0.0602946	0.629296
	child_score	0.507131	0.110355	4.43e-06	0.290834	0.723427				adipose_score	-0.0287546	0.178376	0.872	-0.378372	0.320863

## Sheet: 1g Skinfold
Supplementary File 1g: Multivariable Mendelian randomization analysis of skinfold measures in ALSPAC
Adult-BMI & Child-BMI GRS
outcome	exposure	beta	se	p	lower_CI	upper_CI
mean_biceps	adult_score	-0.232198	0.262367	0.37653	-0.746436	0.282041
	child_score	1.07497	0.294351	0.000284594	0.498036	1.65189
mean_triceps	adult_score	0.0636342	0.268101	0.812471	-0.461844	0.589112
	child_score	1.04466	0.300785	0.00055411	0.455126	1.6342
mean_subscapular	adult_score	-0.118444	0.273519	0.665153	-0.654541	0.417653
	child_score	1.00138	0.306863	0.00116837	0.399924	1.60283
mean_supraileac	adult_score	-0.00992839	0.263844	0.97	-0.527063	0.507206
	child_score	1.21543	0.296009	4.62e-05	0.635256	1.79561

## Sheet: 1h Tissue ALSPAC
Supplementary File 1h: Multivariable Mendelian randomization using tissue-partitioned instruments on childhood leptin
		Univariable MR			Multivariable MR
Exposure	Outcome	Beta	SE	P	Beta_MV	SE_MV	P_MV
Adipose BMI	Leptin	0.607051	0.243737	0.0127917	0.11516	0.303088	0.703997
Brain BMI	Leptin	0.85697	0.233192	0.0002409	0.791332	0.29023	0.00642665

## Sheet: 1i Tissue UVMR
Supplementary File 1i: Univariable Mendelian randomization using tissue-partitioned instruments
Exposure	Outcome	nSNPs	MR Method	Beta	SE	P
Adipose BMI	Leptin	86	Inverse variance weighted	0.389554	0.093486	3.08669e-05
Adipose BMI	Leptin	86	Weighted median	0.295578	0.140529	0.0354373
Adipose BMI	Leptin	86	MR-Egger	0.216873	0.298343	0.469246
Brain BMI	Leptin	140	Inverse variance weighted	0.418726	0.0700177	2.22745e-09
Brain BMI	Leptin	140	Weighted median	0.394299	0.106029	0.000200175
Brain BMI	Leptin	140	MR-Egger	0.371901	0.241166	0.125325

## Sheet: 1j Tissue MVMR
Supplementary File 1j: Multivariable Mendelian randomization using tissue-partitioned instruments on adult leptin
			Univariable MR			Multivariable MR
Exposure	Outcome	nSNPs	Beta	SE	P	Beta_MV	SE_MV	P_MV
Adipose BMI	Leptin	86	0.389554	0.093486	3.08669e-05	0.13839	0.142566	0.331692
Brain BMI	Leptin	140	0.418726	0.0700177	2.22745e-09	0.381863	0.121116	0.00161672

[truncated: 3 more sheets: 1k Tissue deCODE, 1l Q stats and Egger intercept, 1m Tissue MVMR Fat volume]
